# Supplementary material for: Superior energy storage properties in SrTiO3-based dielectric ceramics through all-scale hierarchical architecture
Source: Royal Society of Chemistry journal article supplement (doi:10.1039/d3mh01965a), 2024-01-01
Supplement: d3mh01965a1.pdf [file d3mh01965a1.pdf]

## **Electronic Supplementary Material (ESI) for Materials Horizons.**

### **Superior energy storage properties in SrTiO<sub>3</sub> - based dielectric ceramics through all-scale hierarchical architecture**

Chengyang Zuo<sup>a, b</sup>, Jialing Xu<sup>b</sup>, Shilin Yang<sup>b</sup>, Zhiqin Cao<sup>a</sup>, Hongtao Yu<sup>b</sup>, Jingsong Liu<sup>b</sup>, Xianhua Wei<sup>b,\*</sup>

<sup>a</sup>*College of Vanadium and Titanium, Pan Zhihua University, Pan Zhihua 617000, P. R. China*

<sup>b</sup>*State Key Laboratory of Environmental-friendly Energy Materials, Southwest University of Science and Technology, Mianyang 621010, P. R. China*

\* Corresponding author.

Email address: [weixianhua@swust.edu.cn](mailto:weixianhua@swust.edu.cn) (X. H. Wei).

## Characterization, electrical measurement and numerical simulation

The crystalline structures of powders and ceramics were analyzed by an X-ray diffraction (XRD, X Pert pro, PANalytical B.V.) with Cu  $K\alpha$  radiation. The microscopic morphologies of samples were observed by a transmission electron microscopy (TEM, Talos F200X, FEI) and a high-resolution field emission scanning electron microscope (SEM, SU8020, Hitachi). The morphologies of domain structure were observed by a piezoresponse force microscopy (PFM, Oxford, MFP-3D infinity). The UV-visible (UV-vis) absorption spectrum was meticulously examined using a UV-vis spectrophotometer (UV-3600, Shimadu). The HRMS-900 system and DMS-2000 (Partulab) were used to measure temperature dependent direct current (DC) conductivity and dielectric parameters, respectively. For determining the DC  $E_b$ , we utilized a withstand voltage test system (RK2671AM). The  $P$ - $E$  loops were tested by a ferroelectric analyzer (TF 3000) to determine the key energy storage parameters. The charge-discharge curves were obtained using a pulsed charge-discharge system (CFD-003, Tongguo technology). For those performance measurements, we carefully prepared the ceramics to have a controlled thickness ranging from 0.03 to 0.10 mm. Additionally, we determined the Vickers hardness of the ceramic using a Vickers hardness tester (MH-500). This involved applying a precisely controlled load of 4.9033 N for a time duration of 15 s.

To compare the effect of microstructure on breakdown strength of ceramics, a finite element software (COMSOL) was used to computationally simulate the spatial distribution of electric potential and local electric fields. A rectangular initial geometry with a total size of  $10.24 \times 6.95 \mu\text{m}^2$  was constructed for simulation, in which the spatial distributions of grains and grain boundaries were modeled according to the cross-sectional SEM images. When an electric field of 170 kV/cm was externally applied to the upper and lower sides of the ceramic, the distributions of those electrical parameters were calculated based on the electrostatic balance equation.

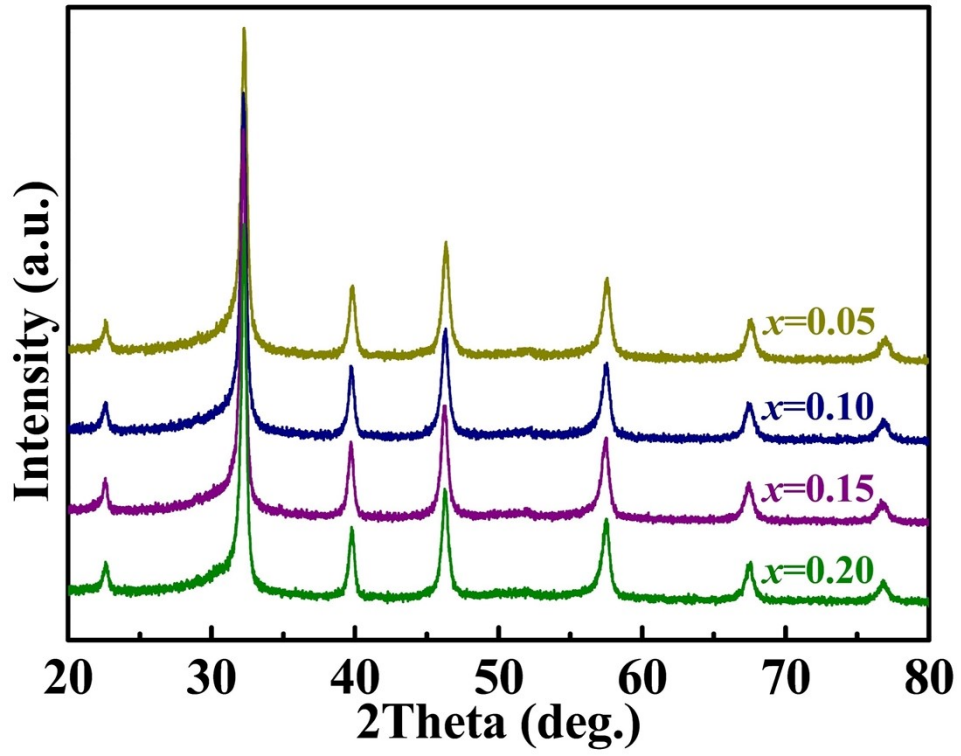

Fig. S1 XRD patterns of  $(1-x)\text{SBT}-x\text{BNZT}$  powders.

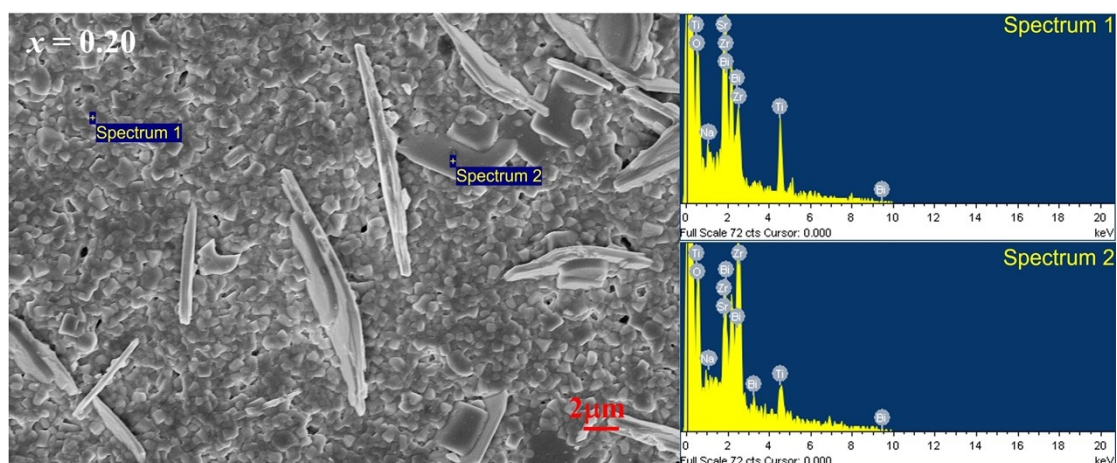

**Fig. S2** Low magnification SEM image of  $x = 0.20$  ceramic.

**Table S1** The distribution of elements in spectrum 1 and 2.

| Spectrum 1 |         |         | Spectrum 2 |         |         |
|------------|---------|---------|------------|---------|---------|
| Element    | Weight% | Atomic% | Element    | Weight% | Atomic% |
| O K        | 26.14   | 63.26   | O K        | 21.36   | 66.38   |
| Na K       | 1.29    | 2.18    | Na K       | 0.03    | 0.08    |
| Ti K       | 19.35   | 15.64   | Ti K       | 11.27   | 11.69   |
| Sr L       | 28.17   | 12.45   | Sr L       | 12.99   | 7.37    |
| Zr L       | 7.66    | 3.25    | Zr L       | 5.03    | 2.74    |
| Bi M       | 17.39   | 3.22    | Bi M       | 49.31   | 11.73   |
| Totals     | 100%    |         | Totals     | 100%    |         |

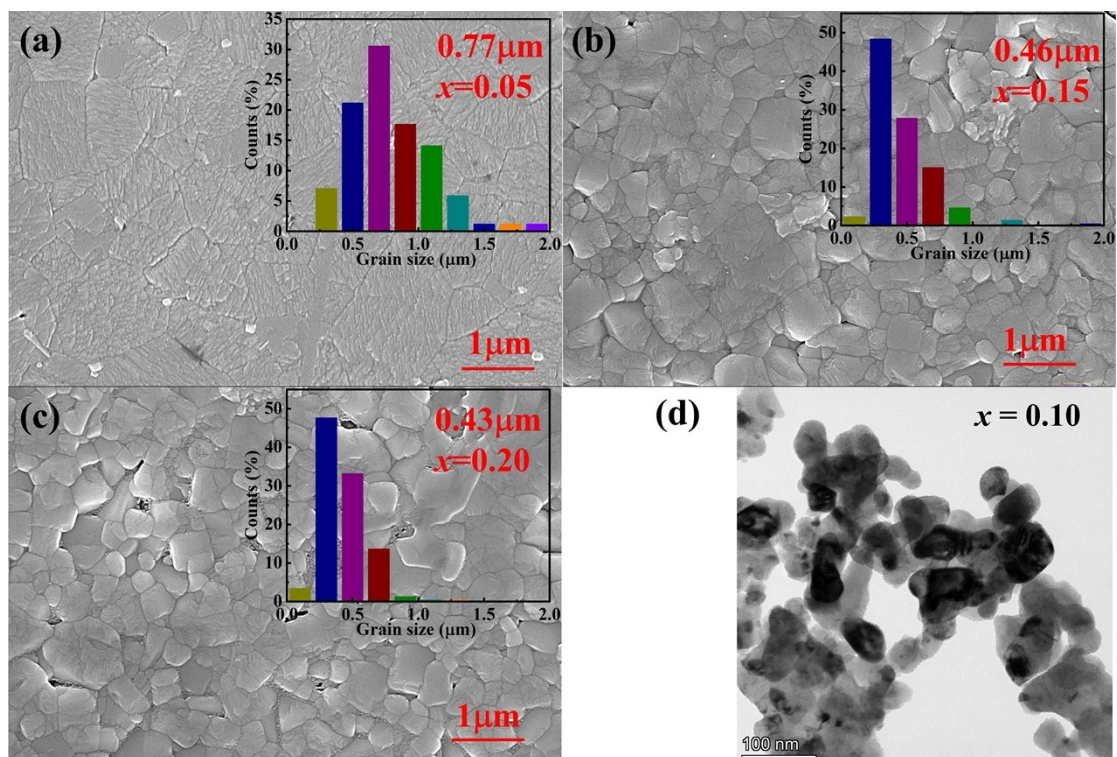

**Fig. S3** Thermally etched surface SEM images of (a)  $x = 0.05$ , (b)  $x = 0.15$ , and (c)  $x = 0.20$ ; (d) TEM image of  $x = 0.10$  ceramic powders.

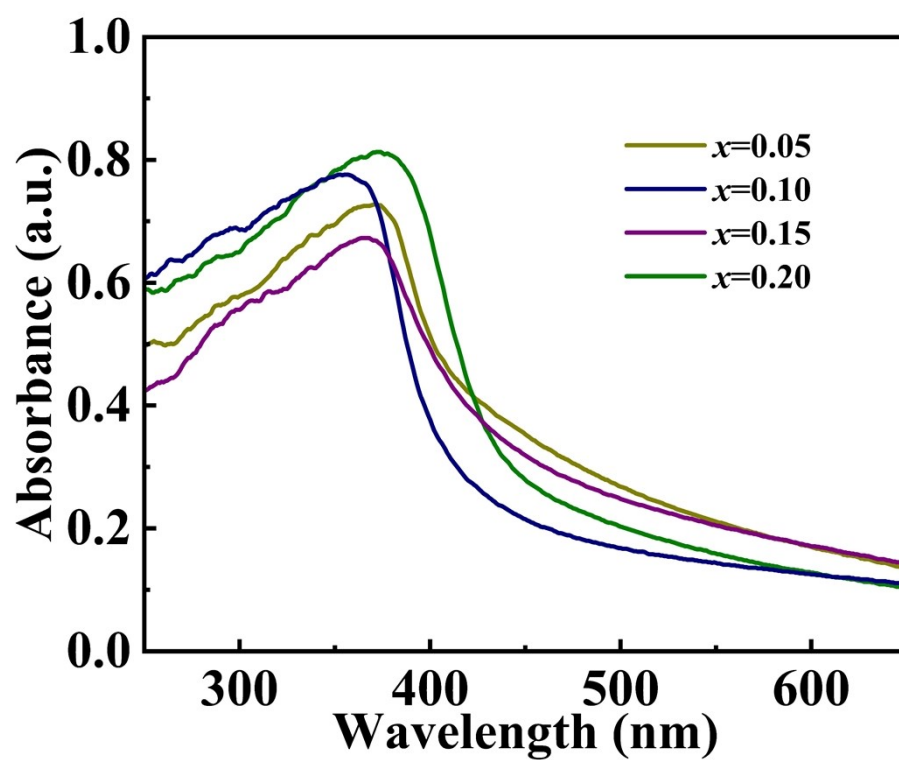

Fig. S4 UV-vis absorption spectra.

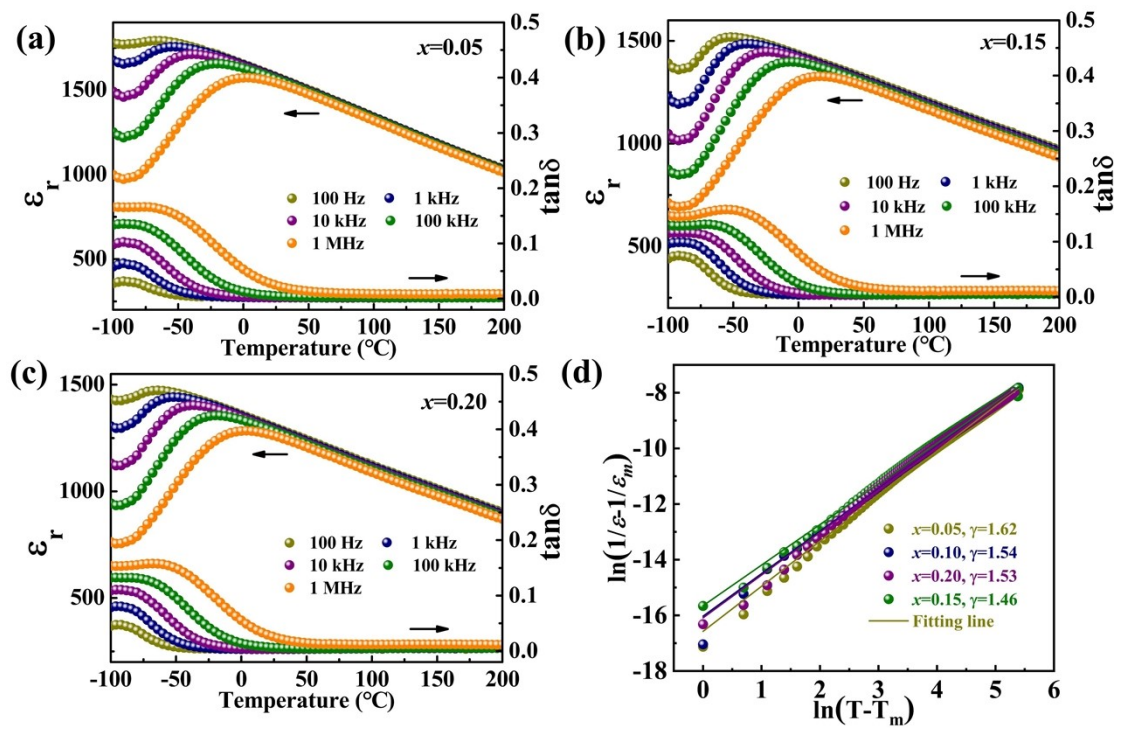

**Fig. S5** (a-c) Temperature dependence of  $\epsilon_r$  and  $\tan\delta$  of  $(1-x)\text{SBT}-x\text{BNZT}$  ( $x = 0.05, 0.15, 0.20$ ) ceramics with various frequencies; (d) Plots of  $\ln(1/\epsilon_r - 1/\epsilon_m)$  versus  $\ln(T - T_m)$  at 1 MHz for  $(1-x)\text{SBT}-x\text{BNZT}$  ceramics.

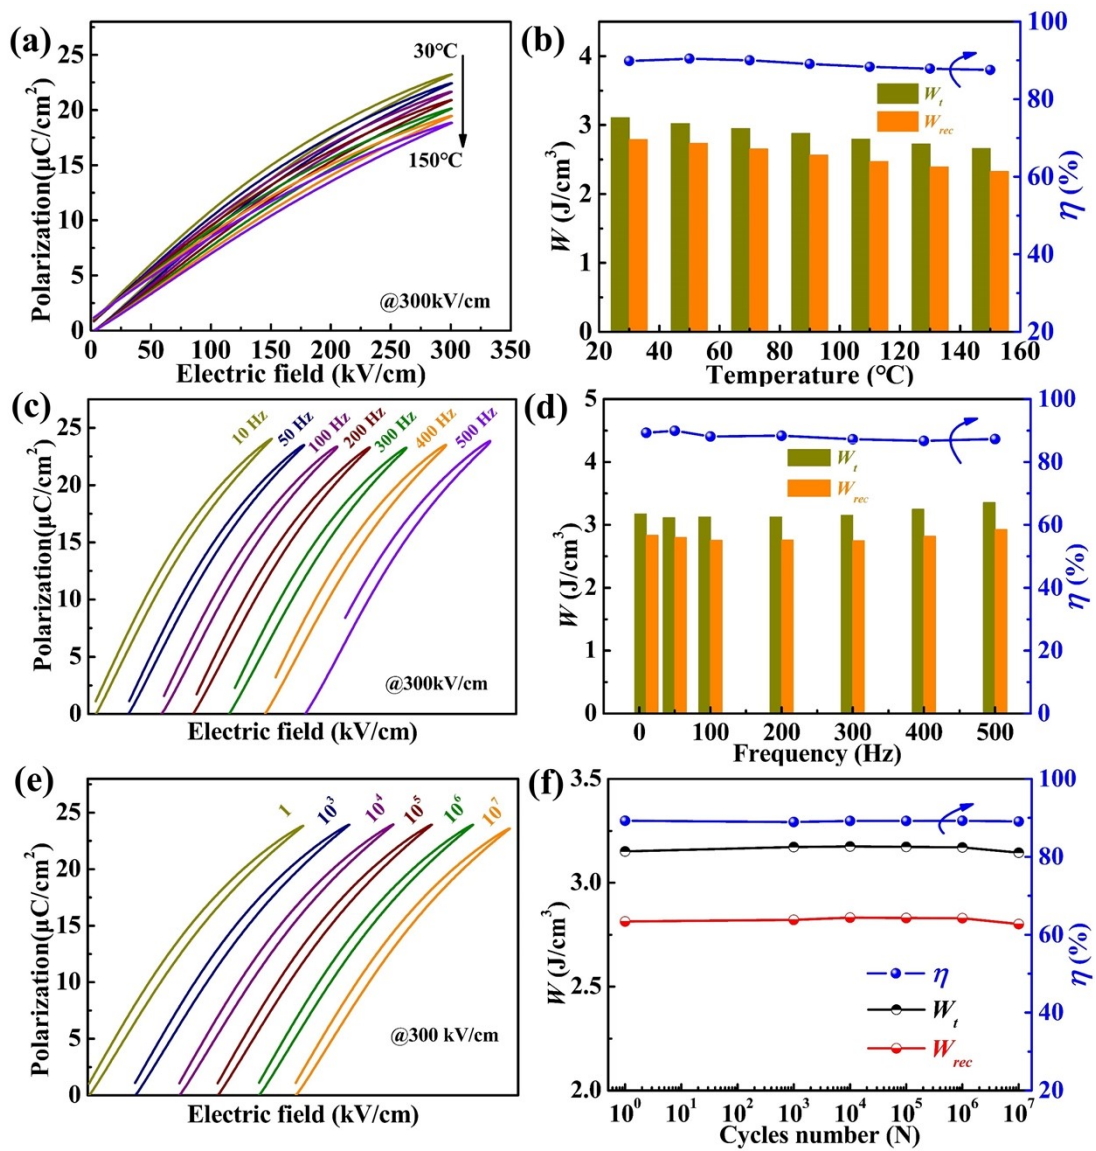

**Fig. S6** Stability of energy storage of  $x = 0.10$  ceramics: (a, c, e) Unipolar  $P$ - $E$  loops at different temperatures, frequencies, and cycle numbers; The corresponding  $W_t$ ,  $W_{rec}$  and  $\eta$  are concluded in (b), (d) and (f).



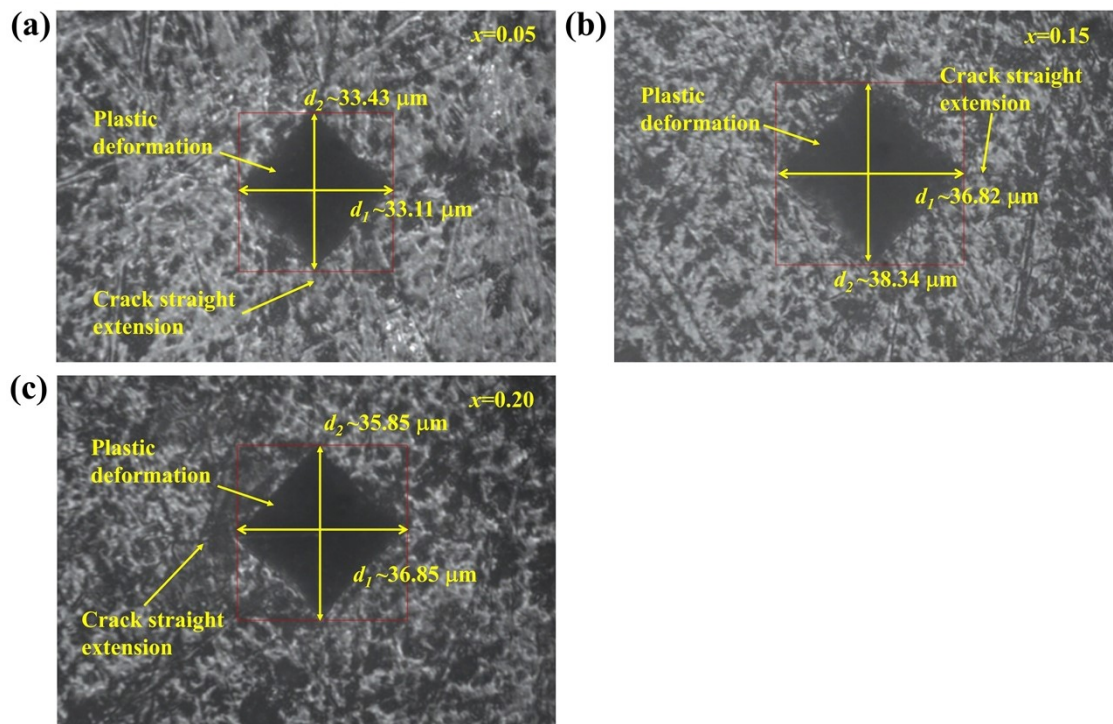

**Fig. S7** The patterns of Vickers indentations and cracks of  $(1-x)\text{SBT}-x\text{BNZT}$  ( $x = 0.05, 0.15, 0.20$ ) ceramics.

**Table S2** The parameters of Vickers hardness test of the  $x = 0.05$  ceramic.

| Number | Load (N) | $d_1$ ( $\mu\text{m}$ ) | $d_2$ ( $\mu\text{m}$ ) | $d_{ave}$ ( $\mu\text{m}$ ) | $H_v$ (GPa) |
|--------|----------|-------------------------|-------------------------|-----------------------------|-------------|
| 1      | 4.9033   | 33.11                   | 33.43                   | 33.27                       | 8.21        |
| 2      | 4.9033   | 34.22                   | 32.56                   | 33.39                       | 8.15        |
| 3      | 4.9033   | 33.22                   | 34.20                   | 33.71                       | 7.99        |
|        |          |                         |                         |                             | Average:8.1 |
|        |          |                         |                         |                             | 2           |

**Table S3** The parameters of Vickers hardness test of the  $x = 0.10$  ceramic.

| Number | Load (N) | $d_1$ ( $\mu\text{m}$ ) | $d_2$ ( $\mu\text{m}$ ) | $d_{ave}$ ( $\mu\text{m}$ ) | $H_v$ (GPa) |
|--------|----------|-------------------------|-------------------------|-----------------------------|-------------|
| 1      | 4.9033   | 32.55                   | 33.19                   | 32.87                       | 8.41        |
| 2      | 4.9033   | 33.03                   | 33.73                   | 33.38                       | 8.16        |
| 3      | 4.9033   | 33.22                   | 33.66                   | 33.44                       | 8.13        |
|        |          |                         |                         |                             | Average:8.2 |
|        |          |                         |                         |                             | 3           |

**Table S4** The parameters of Vickers hardness test of the  $x = 0.15$  ceramic.

| Number | Load (N) | $d_1$ ( $\mu\text{m}$ ) | $d_2$ ( $\mu\text{m}$ ) | $d_{ave}$ ( $\mu\text{m}$ ) | $H_v$ (GPa) |
|--------|----------|-------------------------|-------------------------|-----------------------------|-------------|
| 1      | 4.9033   | 36.82                   | 38.34                   | 37.58                       | 6.43        |
| 2      | 4.9033   | 37.99                   | 37.65                   | 37.82                       | 6.35        |
| 3      | 4.9033   | 39.33                   | 38.19                   | 38.76                       | 6.05        |
|        |          |                         |                         |                             | Average:6.2 |
|        |          |                         |                         |                             | 8           |

**Table S5** The parameters of Vickers hardness test of the  $x = 0.20$  ceramic.

| Number | Load (N) | $d_1$ ( $\mu\text{m}$ ) | $d_2$ ( $\mu\text{m}$ ) | $d_{ave}$ ( $\mu\text{m}$ ) | $H_v$ (GPa) |
|--------|----------|-------------------------|-------------------------|-----------------------------|-------------|
| 1      | 4.9033   | 36.85                   | 35.85                   | 36.35                       | 6.87        |
| 2      | 4.9033   | 35.77                   | 37.03                   | 36.40                       | 6.86        |
| 3      | 4.9033   | 37.55                   | 35.67                   | 36.61                       | 6.78        |
|        |          |                         |                         |                             | Average:6.8 |
|        |          |                         |                         |                             | 4           |
